# Supplementary material for: Fluorescent analysis of boar sperm capacitation process in vitro
Source: PubMed Central journal article supplement (PMC6923987; doi:10.1186/s12958-019-0554-z), 2019-12-19

**CTC**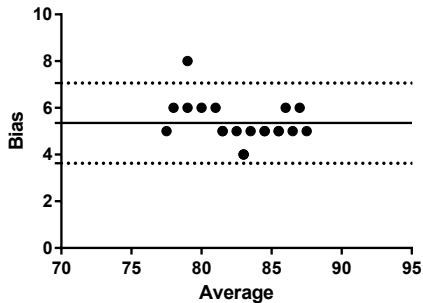**ACR.2**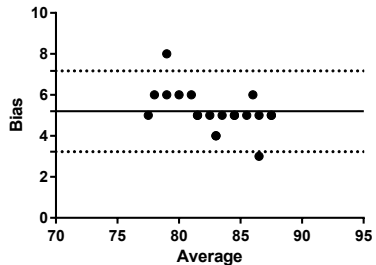**pY**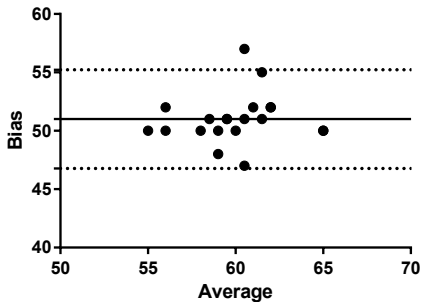**Phall**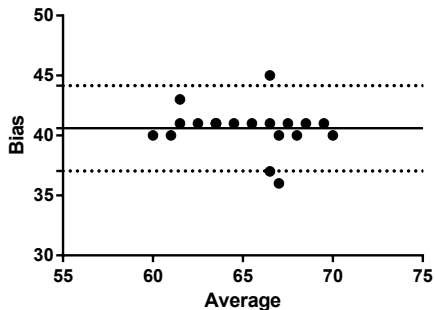

Supplement: 12958_2019_554_MOESM3_ESM.pdf [file 12958_2019_554_MOESM3_ESM.pdf]
